# Supplementary material for: In-plume and out-of-plume analysis of aerosol–cloud interactions derived from the 2014–2015 Holuhraun volcanic eruption
Source: Copernicus journal article supplement (doi:10.5194/acp-24-9533-2024), 2024-08-29
Supplement: Supplementary file [file acp-24-9533-2024-supplement-title-page.pdf › acp-24-9533-2024-supplement-title-page.pdf]

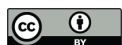

## *Supplement of*

# **In-plume and out-of-plume analysis of aerosol–cloud interactions derived from the 2014–2015 Holuhraun volcanic eruption**

**Amy H. Peace et al.**

*Correspondence to:* Amy H. Peace (amy.peace@metoffice.gov.uk)

- acp-24-9533-2024-supplement-title-page.pdf
- supplement
  - animS1.gif
  - animS2.gif
  - animS3.gif
  - animS4.gif
  - animS5.gif
  - animS6.gif
  - animS7.gif
  - animS8.gif
  - animS9.gif
  - ap\_holplumaanalysis\_SI\_review\_1-1.pdf

The copyright of individual parts of the supplement might differ from the article licence.
